# Supplementary material for: Comprehensive prognostic and immunological analysis of Cullin2 in pan-cancer and its identification in hepatocellular carcinoma
Source: publisher site journal article supplement (doi:10.18632/aging.205848), 2024-05-22
Supplement: Supplementary file [file aging-v16i10-205848-supplementary-material-SD1.pdf]

SUPPLEMENTARY FIGURES

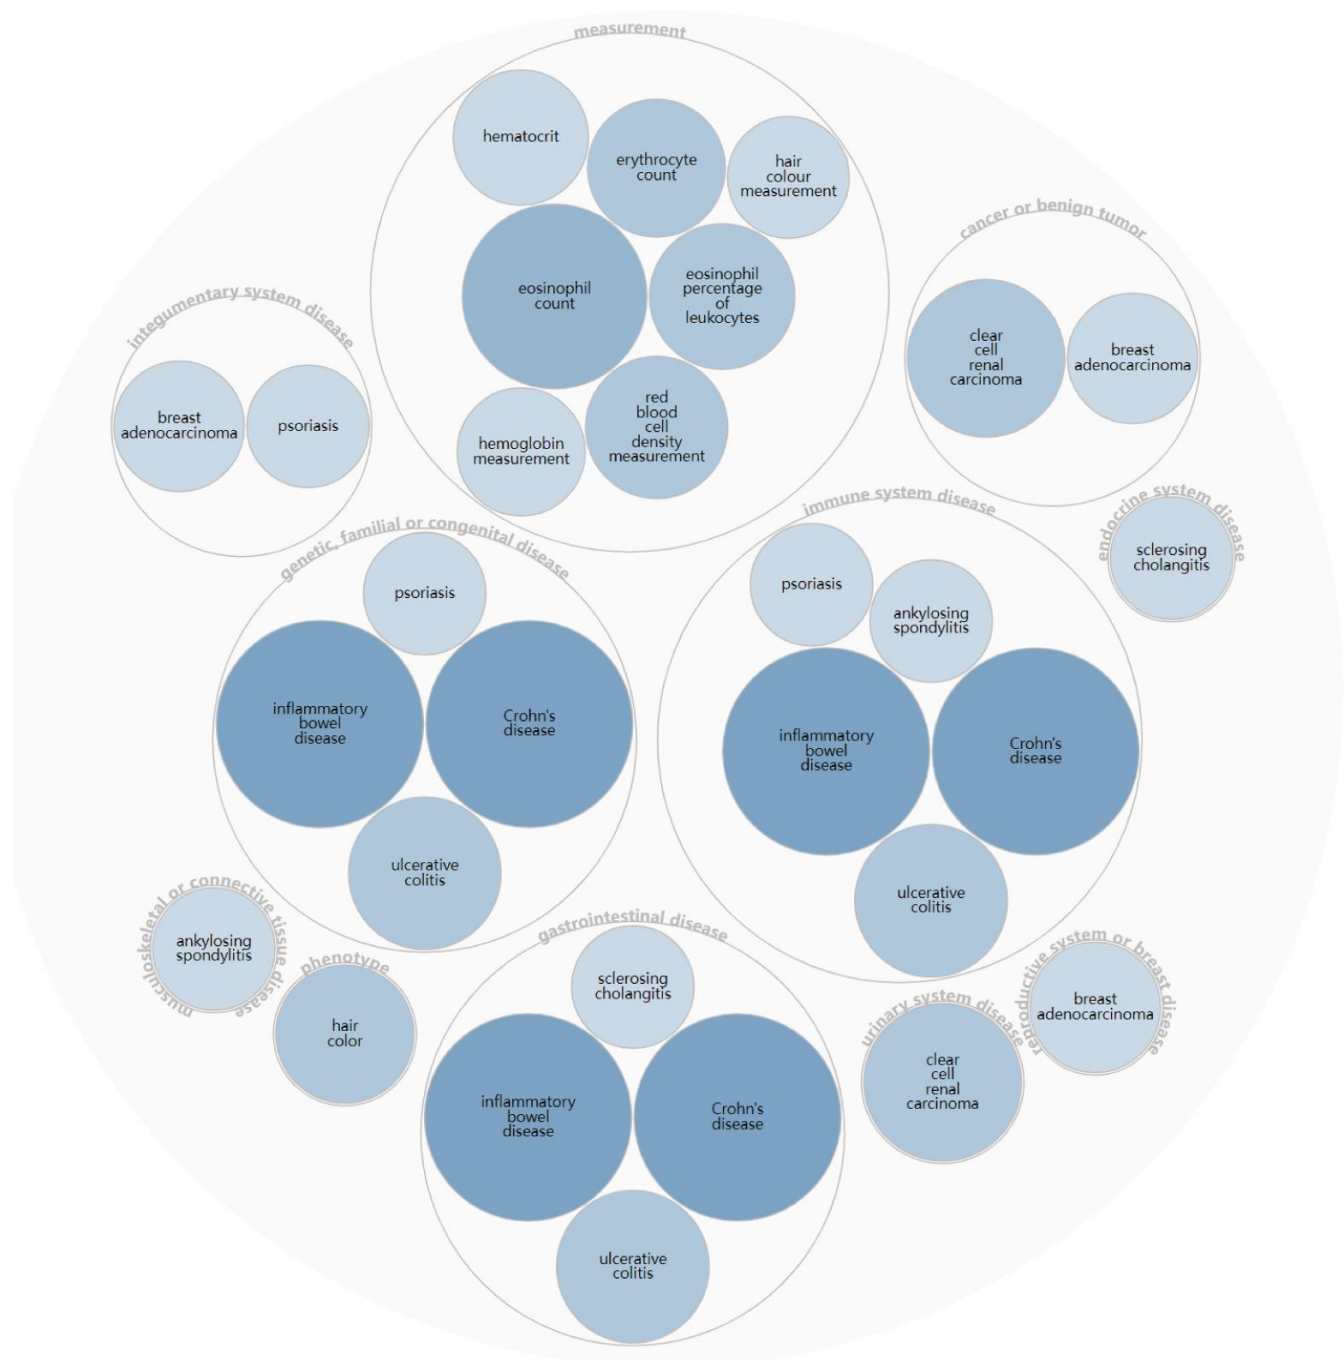

Supplementary Figure 1. The CUL2-associated disease network.

### Relationship between CUL2 expression and the immunescores.

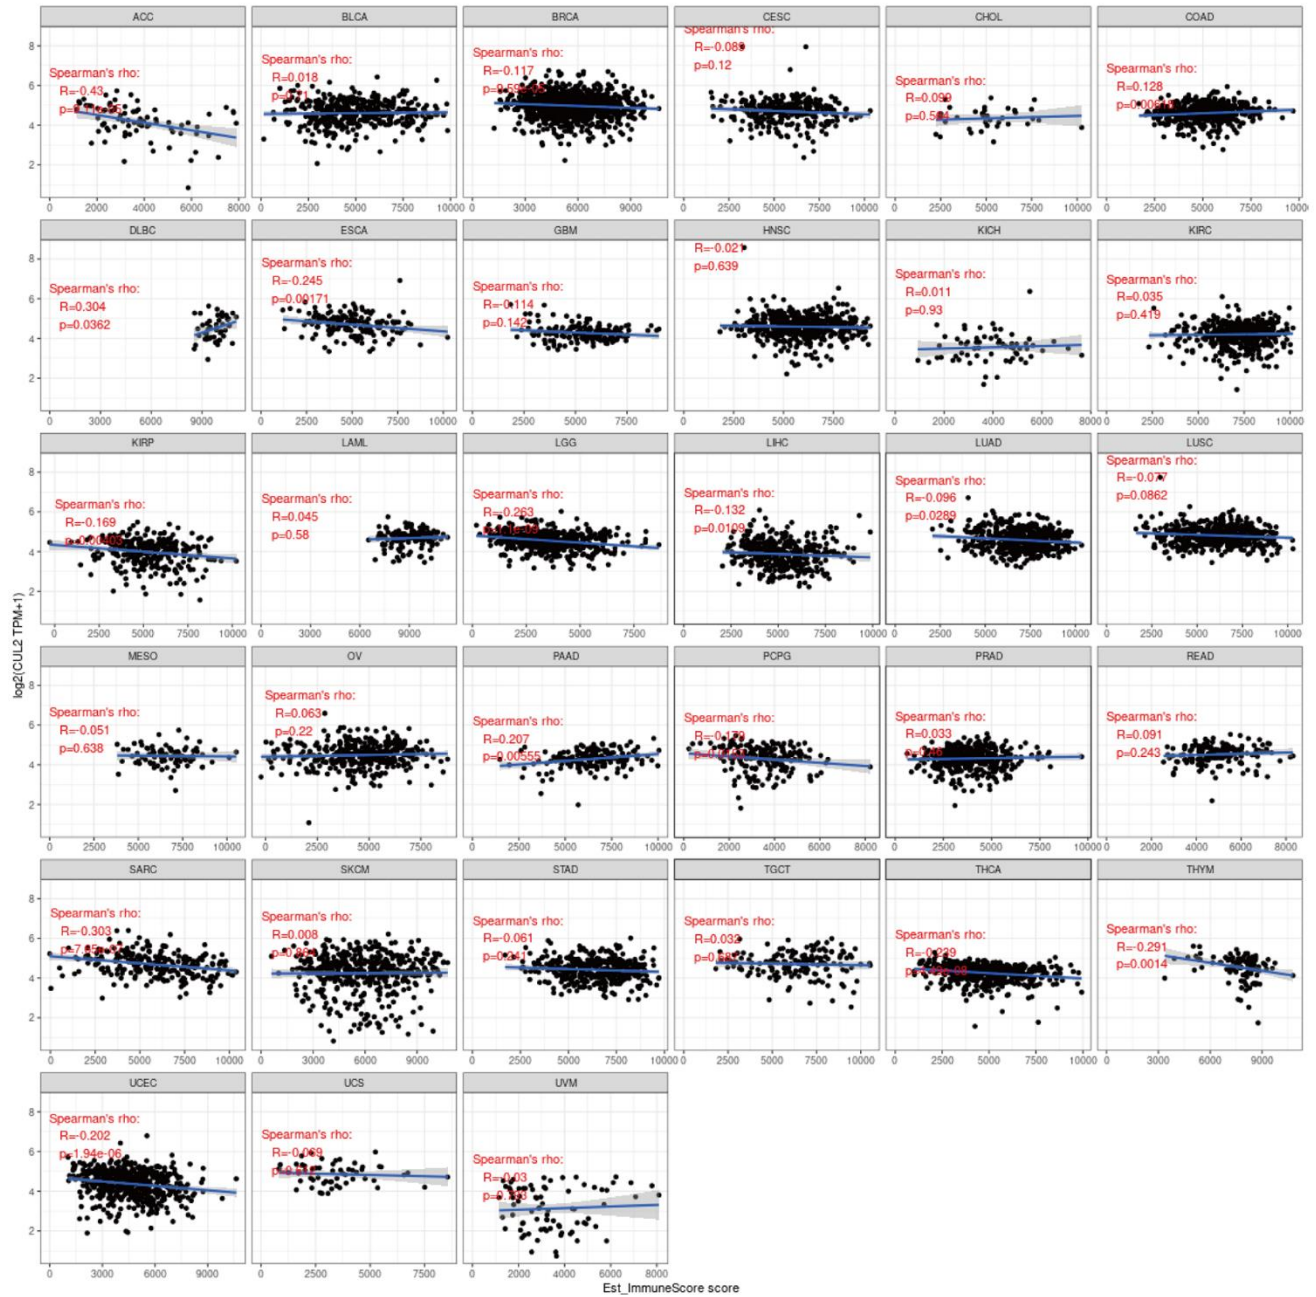

Supplementary Figure 2. Correlation analysis between expression levels of CUL2 and ImmuneScore in pan-cancer.

**Relationship between HOXB9 expression and the estimatescores.**

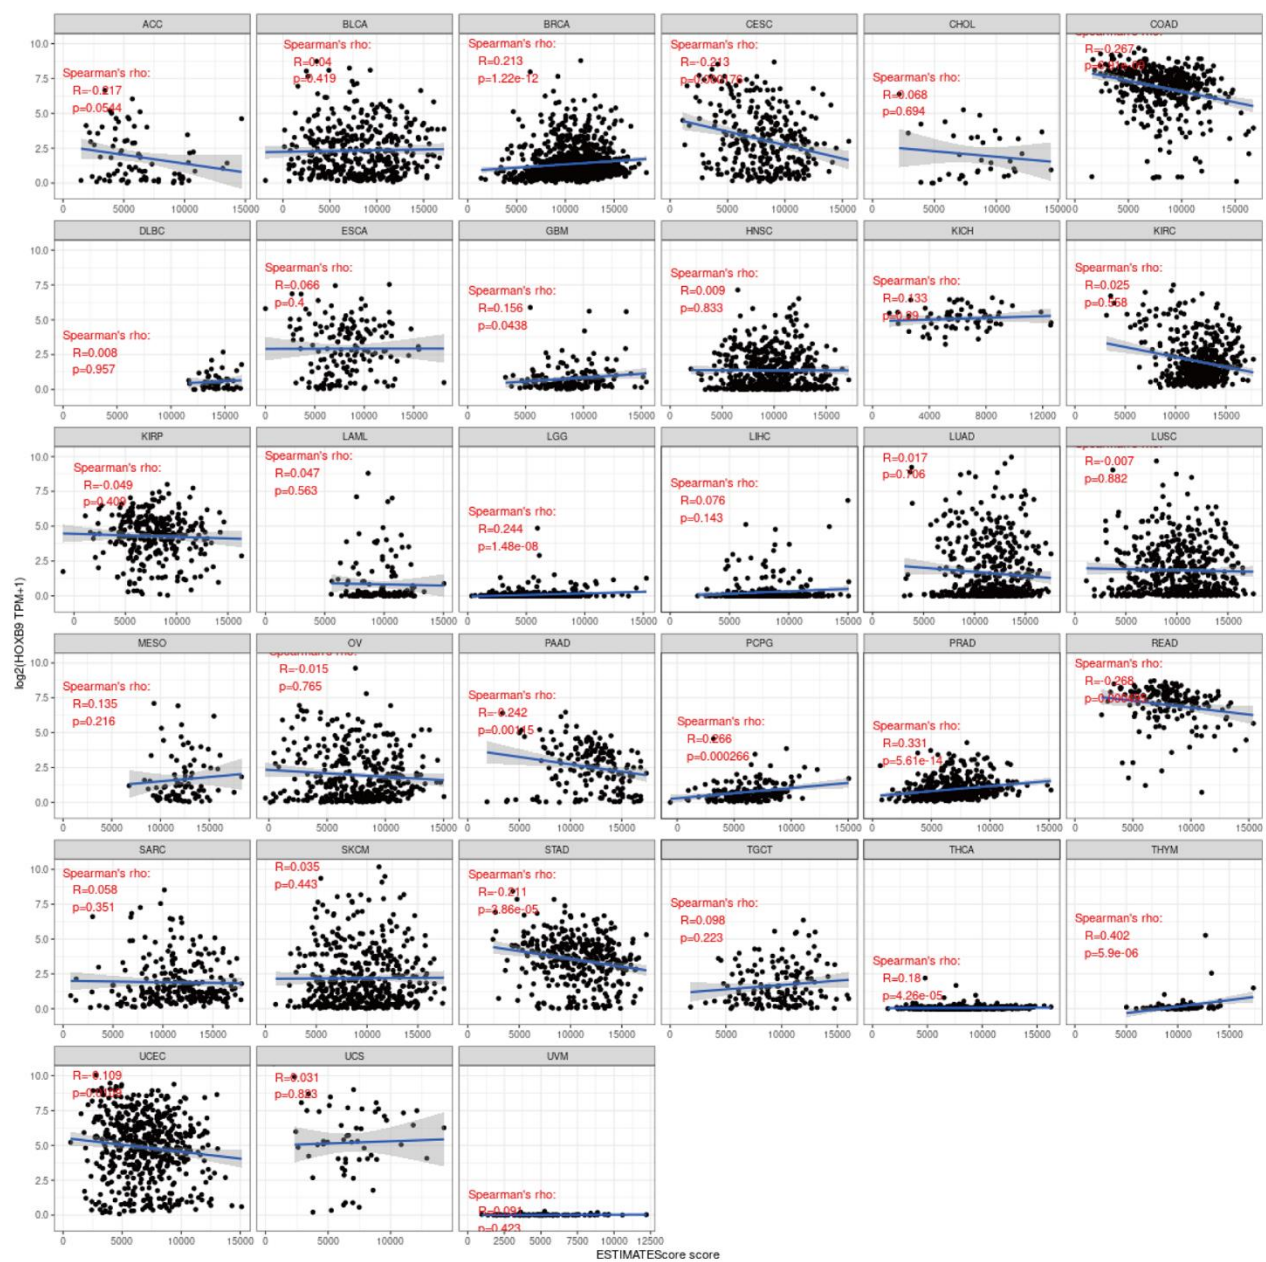

**Supplementary Figure 3. Correlation analysis between expression levels of CUL2 and EstimateScore in pan-cancer.**

## Relationship between CUL2 expression and the stromalscores

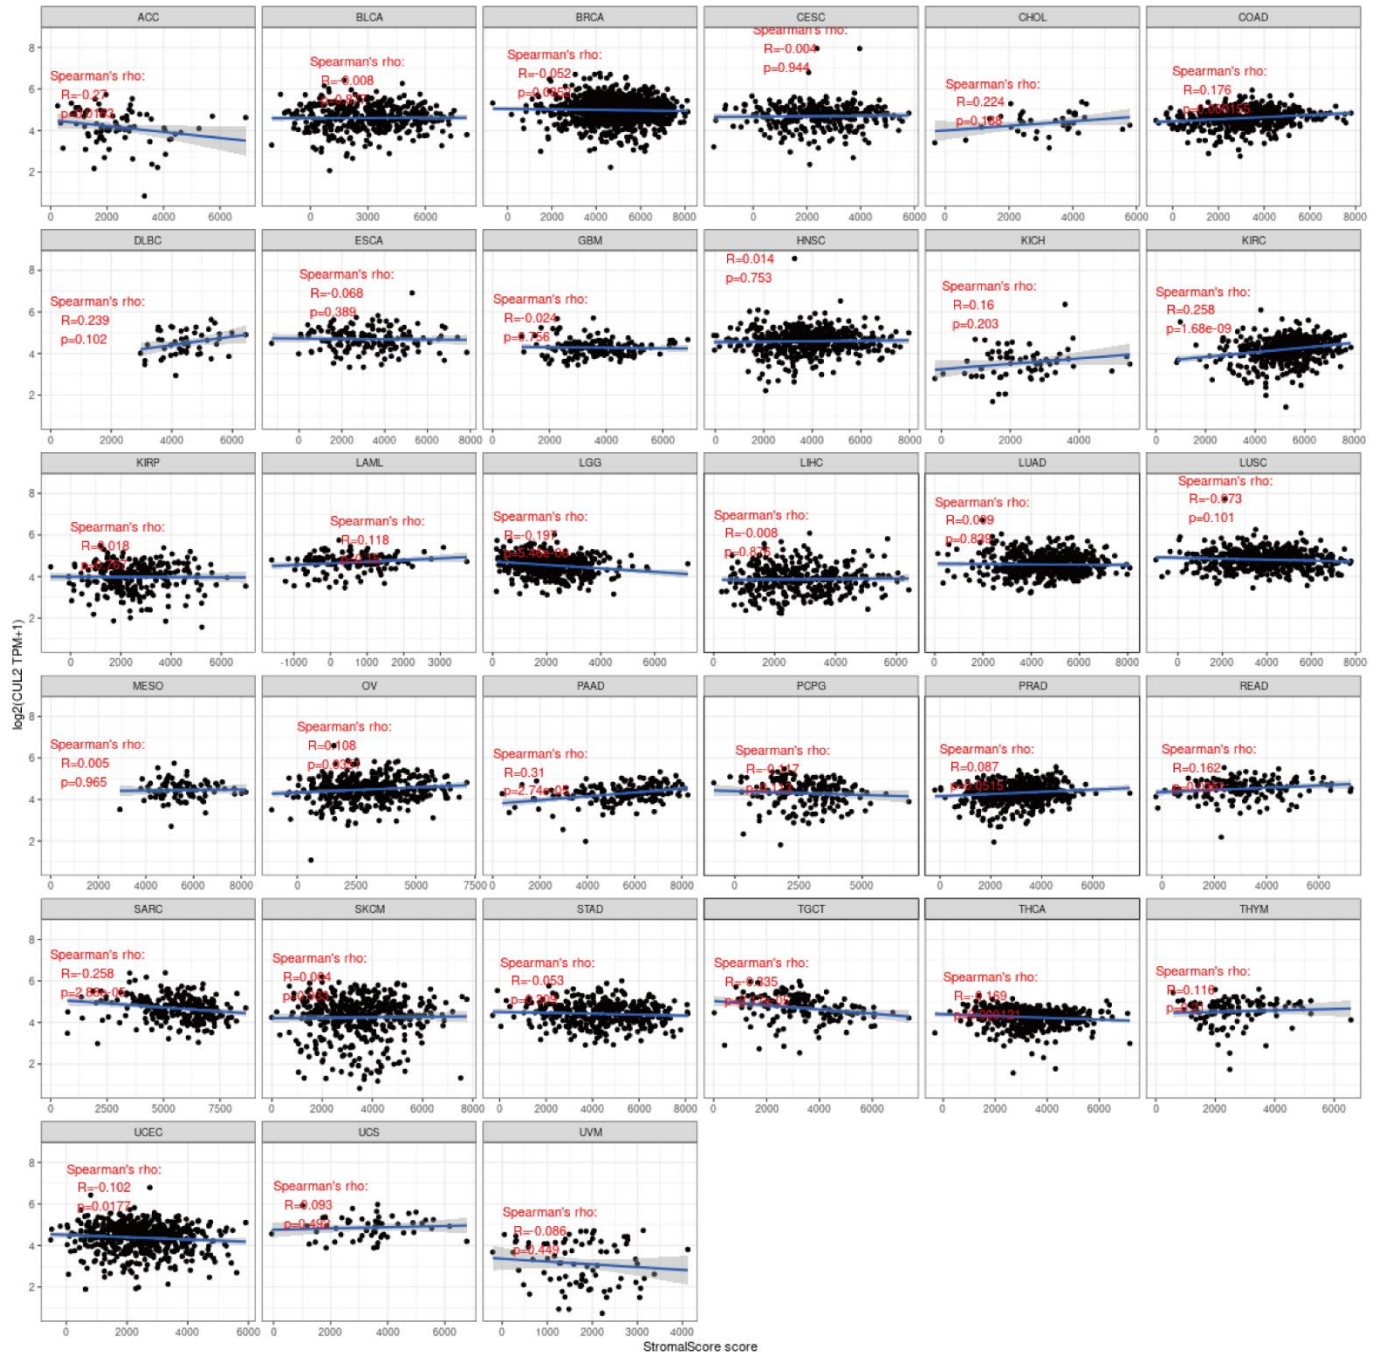

Supplementary Figure 4. Correlation analysis between expression levels of CUL2 and StromalScore in pan-cancer.

Relationship between CUL2 levels and neoantigens in pan-cancer

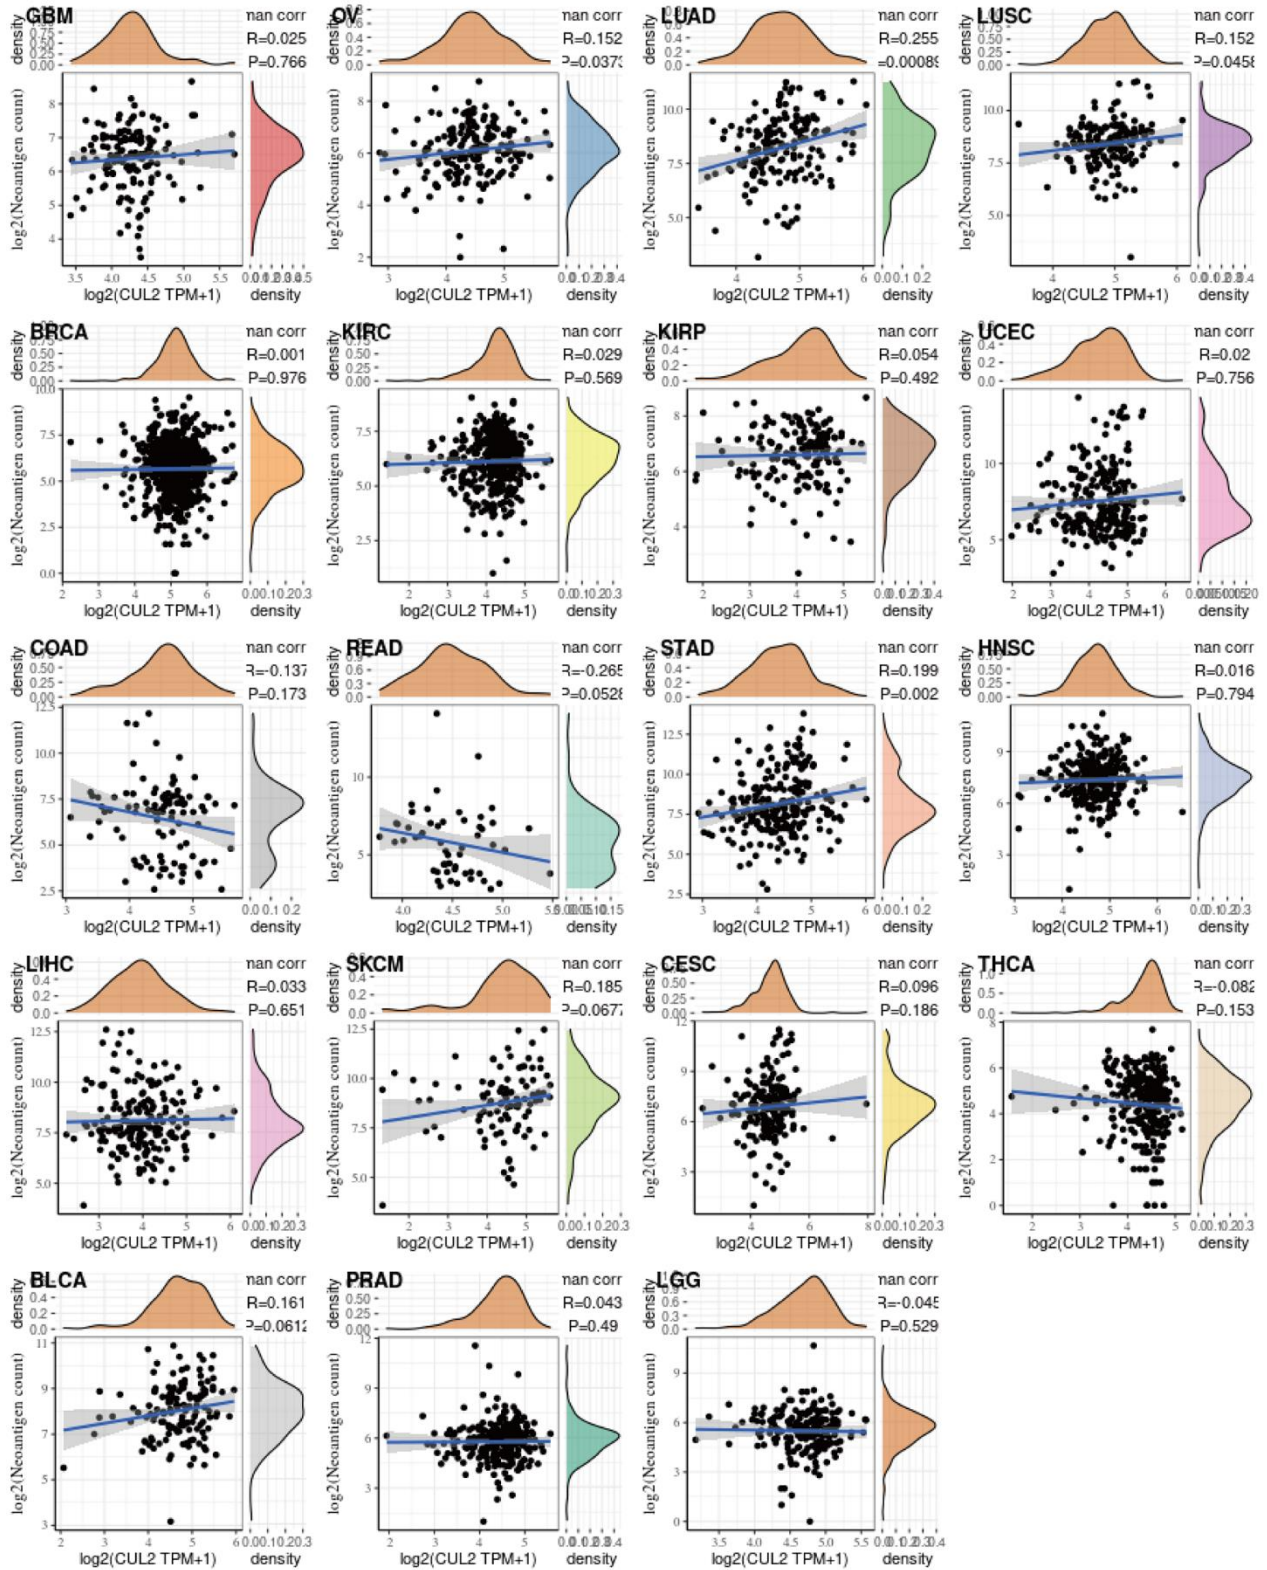

Supplementary Figure 5. Correlation analysis between CUL2 expression in pan-cancer and the number of tumors neoantigens in pan-cancer.
