# Supplementary material for: Comprehensive prognostic and immunological analysis of Cullin2 in pan-cancer and its identification in hepatocellular carcinoma
Source: publisher site journal article supplement (doi:10.18632/aging.205848), 2024-05-22
Supplement: Supplementary file [file aging-v16i10-205848-supplementary-material-SD2.pdf]

## SUPPLEMENTARY TABLES

**Supplementary Table 1. Abbreviations of various cancers.**

| <b>Abbreviations</b> | <b>Full name</b>                                                 |
|----------------------|------------------------------------------------------------------|
| ACC                  | Adrenocortical carcinoma                                         |
| BLCA                 | Bladder Urothelial Carcinoma                                     |
| BRCA                 | Breast invasive carcinoma                                        |
| CESC                 | Cervical squamous cell carcinoma and endocervical adenocarcinoma |
| CHOL                 | Cholangiocarcinoma                                               |
| COAD                 | Colon adenocarcinoma                                             |
| DLBC                 | Lymphoid Neoplasm Diffuse Large B-cell Lymphoma                  |
| ESCA                 | Esophageal carcinoma                                             |
| FPPP                 | FFPE Pilot Phase II                                              |
| GBM                  | Glioblastoma multiforme                                          |
| GBMLGG               | Glioma                                                           |
| HNSC                 | Head and Neck squamous cell carcinoma                            |
| KICH                 | Kidney Chromophobe                                               |
| KIPAN                | Pan-kidney cohort (KICH+KIRC+KIRP)                               |
| KIRC                 | Kidney renal clear cell carcinoma                                |
| KIRP                 | Kidney renal papillary cell carcinoma                            |
| LAML                 | Acute Myeloid Leukemia                                           |
| LGG                  | Brain Lower Grade Glioma                                         |
| LIHC                 | Liver hepatocellular carcinoma                                   |
| LUAD                 | Lung adenocarcinoma                                              |
| LUSC                 | Lung squamous cell carcinoma                                     |
| MESO                 | Mesothelioma                                                     |
| OV                   | Ovarian serous cystadenocarcinoma                                |
| PAAD                 | Pancreatic adenocarcinoma                                        |
| PCPG                 | Pheochromocytoma and Paraganglioma                               |
| PRAD                 | Prostate adenocarcinoma                                          |
| READ                 | Rectum adenocarcinoma                                            |
| SARC                 | Sarcoma                                                          |
| STAD                 | Stomach adenocarcinoma                                           |
| SKCM                 | Skin Cutaneous Melanoma                                          |
| STES                 | Stomach and Esophageal carcinoma                                 |
| TGCT                 | Testicular Germ Cell Tumors                                      |
| THCA                 | Thyroid carcinoma                                                |
| THYM                 | Thymoma                                                          |
| UCEC                 | Uterine Corpus Endometrial Carcinoma                             |
| UCS                  | Uterine Carcinosarcoma                                           |
| UVM                  | Uveal Melanoma                                                   |
| OS                   | Osteosarcoma                                                     |
| ALL                  | Acute Lymphoblastic Leukemia                                     |

**Supplementary Table 2. The antibodies and reagents used.**

| <b>Reagent</b>                    | <b>Source</b>                          | <b>Identifier</b> |
|-----------------------------------|----------------------------------------|-------------------|
| BCA protein assay kit             | Beyotime                               | Cat#P0012         |
| Rabbit Anti-Cullin2               | Abcam                                  | Cat# ab-166917    |
| Alpha Tubulin Monoclonal antibody | Proteintech                            | Cat# 66031-1-Ig   |
| DAPI                              | Sigma-Aldrich                          | Cat# D9542        |
| Crystal violet                    | Solarbio                               | Cat# G1062        |
| Fetal bovine serum                | Gibco                                  | Cat# 10099141     |
| PBS                               | Solarbio                               | Cat# P1020        |
| Cell Counting Kit-8 Kit           | Beyotime Institute of<br>Biotechnology | Cat#C0037         |
| Edu Kit                           | Ribobio                                | Cat#C10310        |
